# Supplementary material for: Upconversion nanoparticles incorporated with three-dimensional graphene composites for electrochemical sensing of baicalin from natural plants
Source: Royal Society of Chemistry journal article supplement (doi:10.1039/d4ra06540a), 2024-01-01
Supplement: d4ra06540a1.pdf [file d4ra06540a1.pdf]

## Supporting information

### Upconversion nanoparticles incorporated with three - dimensional graphene composites for electrochemically sensing Baicalin from the natural plants

Na zhang <sup>a,b,c</sup>, Yilin Wu <sup>b</sup>, Tian Liang <sup>b</sup>, Yongxiang Su <sup>b</sup>, Xusheng Xie <sup>b</sup>, Tianren Zhang <sup>b</sup>, Hongyan Wang <sup>b</sup>, Keying Zhang <sup>b\*</sup>, Rongli Jiang <sup>a\*</sup>

<sup>a</sup> School of Chemical Engineering and Technology, China University of Mining and Technology, Xuzhou, Jiangsu 221116, China

<sup>b</sup> Anhui Key Laboratory of Spin Electron and Nanomaterials of Anhui Higher Education Institutes, School of Chemistry and Chemical Engineering, Suzhou University, Suzhou, Anhui, 234000, China

<sup>c</sup> Jiangsu Key Laboratory for Design and Manufacture of Micro-Nano Biomedical Instruments, Southeast University, Jiangsu 211189, Jiangsu Province, China

#### \*Corresponding Authors:

E-mail addresses: ronglijcumt@163.com (R. Jiang); zhangky1983@163.com (K. Zhang)

## **Material and methods**

### **Reagents and apparatus**

Graphene oxide (GO) were purchased from Tianjin Guangfu Fine Chemical Research Institute. Yttrium (III) acetate hydrate (99.99%), ytterbium(III) acetate hydrate (99.99%), and erbium(III) acetate hydrate (99.99%) were purchased from HWRK Chem. 1-octadecene (ODE) (90%), oleic acid (OA) (90%), baicalin, sucrose (Suc), glucose (Glu), L-cysteine (L-cys), ellagic acid (Ea), ZnCl<sub>2</sub>, and MgCl<sub>2</sub> were purchased from Alfa Aesar. Scutellaria baicalensis root was purchased from the local pharmacy. All reagents were of analytical grade, and used without further purification. The phosphate buffered saline (PBS) was prepared with NaH<sub>2</sub>PO<sub>4</sub> and Na<sub>2</sub>HPO<sub>4</sub>, pH value was adjusted by using NaOH and H<sub>3</sub>PO<sub>4</sub>, All solutions were prepared with doubly distilled water.

Scanning electron microscope (SEM) images was obtained by SU1510 scanning electron microscope (Japan Hitachi ltd). Transmission electron microscopy (TEM) images was obtained by JEM-2100 transmission electron microscope. X-ray diffractometer (XRD) data was recorded by SmartLab 3KW (Japan Rigaku Co.). Electrochemical measurements were operated on a CHI660A electrochemical workstation (Shanghai Chenhua Instruments Co., China). The three electrode system was adopted (Work electrode: Bare GCE or modified electrode; Reference electrode: Saturated calomel electrode (SCE); Counter electrode: Platinum wire. High-purity N<sub>2</sub> was employed to remove oxygen for 15 min and kept over the solution during the measurements.

### **Preparation of NaYF<sub>4</sub>: Yb, Er**

The OA-UCNPs (OA-NaYF<sub>4</sub>:Yb, Er) were prepared. In a typical procedure, 0.78 mmol Y(CH<sub>3</sub>CO<sub>2</sub>)<sub>3</sub>, 0.20 mmol Yb(CH<sub>3</sub>CO<sub>2</sub>)<sub>3</sub> and 0.02 mmol Er(CH<sub>3</sub>CO<sub>2</sub>)<sub>3</sub> were mixed with 7 mL oleic acid and 15 mL 1-octadecene in a 100 mL flask. The mixture was heated to 150 °C under a gentle nitrogen flow and maintained at this temperature for 40 min forming a transparent colorless solution. After cooling down to 50 °C, 10 mL methanol containing NH<sub>4</sub>F (4.0 mmol) and sodium oleate (2.5 mmol) was slowly added into the flask and stirred for 40 min at 50 °C. After the methanol was evaporated at 100 °C, the solution was heated to 290 °C under nitrogen for 1.5 h and then cooled down to room temperature. The nanoparticles were precipitated with ethanol and washed with ethanol twice, and then redispersed in 5 mL cyclohexane.

### **Preparation of ligand-free NaYF<sub>4</sub>: Yb, Er**

The OA-UCNPs (OA-NaYF<sub>4</sub>:Yb, Er) were transferred into water. Briefly, the as-prepared OA-UCNPs were ultrasonicated in a solution containing HCl (1.0 M) ( $V_{\text{water}}/V_{\text{ethanol}} = 1:1$ ) and kept for 30 min to remove OA from the surface of the UCNPs. The ligands-free UCNPs were then collected by centrifugation at 18,000 rpm for 20 min and further purified using an HCl/absolute ethanol solution (pH < 4.0; 0.1 M). Finally, the ligands-free UCNPs were washed with ethanol/water three times.

## Results and discussion

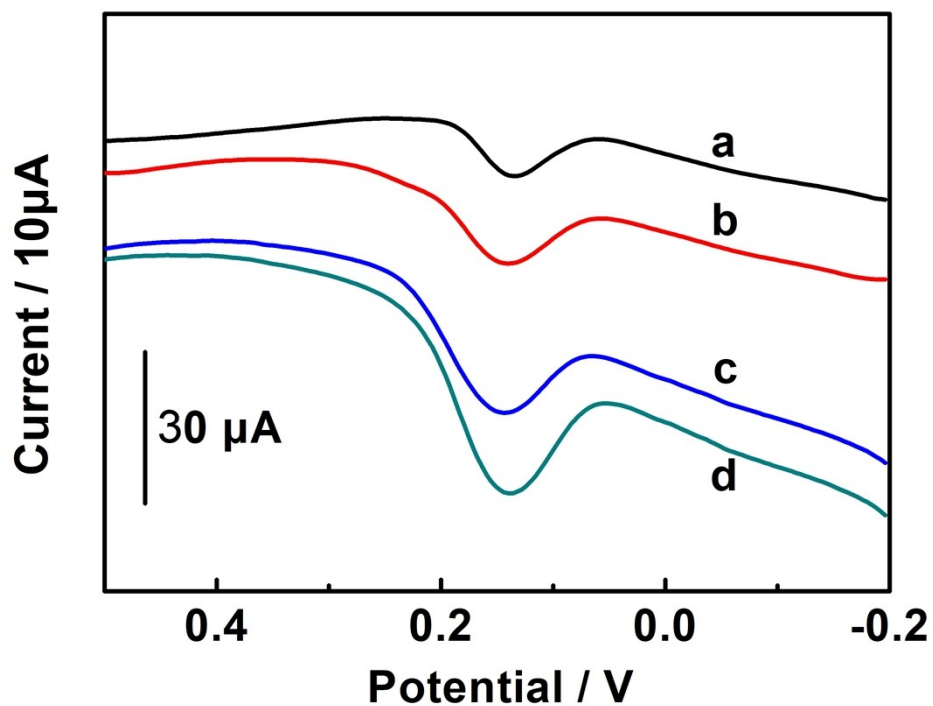

**Fig. S1.** The DPVs of Bn at the different electrodes surfaces: bare GCE (a), UCNPs/GCE (b), 3DG/GCE (c) and UCNPs-3DG/GCE (d) in 0.1 M PBS (pH =7.0).

Pulse period of DPV: 0.2 s.

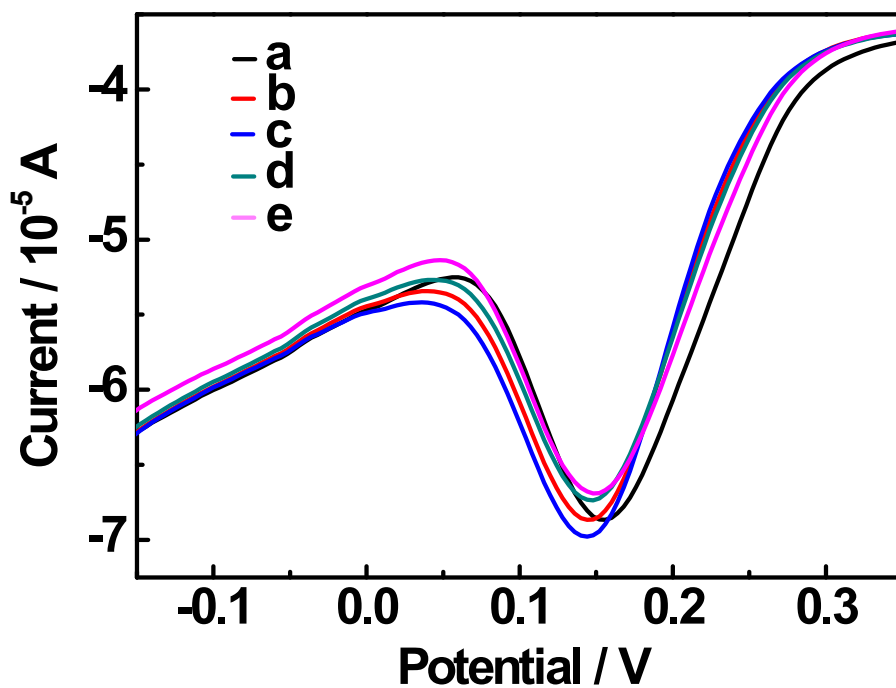

**Fig. S2.** The DPVs of  $1.0 \times 10^{-6}$  M Bn on the independently fabricating five UCNPs-3DG/GCE in 0.1 M PBS (pH 7.0), respectively.
